# Supplementary material for: Akt regulates neurite growth by phosphorylation-dependent inhibition of radixin proteasomal degradation
Source: PubMed Central journal article supplement (PMC5803261; doi:10.1038/s41598-018-20755-w), 2018-02-07

## Supplementary Information

### **Akt regulates neurite growth by phosphorylation-dependent inhibition of radixin proteasomal degradation**

Eun-Ju Jin<sup>1,2#</sup>, Hyo Rim Ko<sup>1,2#</sup>, Inwoo Hwang<sup>1,2</sup>, Byeong-Seong Kim<sup>1</sup>, Jeong-Yun Choi<sup>1</sup>, Kye Won Park<sup>3</sup>, Sung-Woo Cho<sup>4</sup>, and Jee-Yin Ahn<sup>1,2,5\*</sup>

<sup>1</sup>Department of Molecular Cell Biology, Sungkyunkwan University School of Medicine, Suwon 16419, Korea

<sup>2</sup>Single Cell Network Research Center, Sungkyunkwan University School of Medicine, Suwon 16419, Korea

<sup>3</sup>Department of Food Science and Biotechnology, College of Biotechnology and Bioengineering, Sungkyunkwan University, Suwon 16419, Korea

<sup>4</sup>Department of Biochemistry and Molecular Biology, University of Ulsan, College of Medicine, Seoul 05505, Korea

<sup>5</sup>Samsung Medical Center, Seoul 06351, Korea

# These authors are equally contributed.

\***Correspondence should be addressed to** Jee-Yin Ahn, Department of Molecular Cell Biology, Sungkyunkwan University School of Medicine, 2066, Seobu-ro, Jangan-gu, Suwon 16419, Korea  
Phone: 82-31-299-6134; Fax: 82-31-299-6139; E-mail: [jeeahn@skku.edu](mailto:jeeahn@skku.edu)

## **Supplementary Figure legends**

### **Figure S1.**

HEK293T cells were co-transfected with Flag–Akt and GFP–radixin–WT, GFP–radixin–T573A, GFP–radixin–T564A, or GFP (mock), and the cell lysates were subjected to immunoprecipitation with anti-Flag antibody. Protein expression levels were determined by IB using the indicated antibodies. The uncropped blot images are shown in supplementary figure 8.

### **Figure S2.**

PC12 cells were co-transfected with HA-Ub and GST-radixin-WT, GST-radixin-T573A, or GST-radixin-T564A and the cell lysates were subjected to GST pull down. Ubiquitination was analyzed with anti-HA antibody. The uncropped blot images are shown in supplementary figure 9.

### **Figure S3.**

(A) HEK293T cells were co-transfected with GST-Akt and GFP–USP14, or GFP (mock). The cell lysates were subjected to GST pulldown assay. (B) HEK293T cells were co-transfected with GST–radixin and GFP-USP14. At 24 h after transfection, cell lysates were subjected to GST pulldown assay and IB with the indicated antibodies. The uncropped blot images are shown in supplementary figure 10.

### **Figure S4.**

These are uncropped blot images corresponding to data show in Figure 1.

### **Figure S5.**

These are uncropped blot images corresponding to data show in Figure 2.

### **Figure S6.**

These are uncropped blot images corresponding to data show in Figure 3.

**Figure S7.**

These are uncropped blot images corresponding to data show in Figure 4.

**Figure S8.**

These are uncropped blot images corresponding to data show in Figure S1.

**Figure S9.**

These are uncropped blot images corresponding to data show in Figure S2.

**Figure S10.**

These are uncropped blot images corresponding to data show in Figure S3.

Figure S1

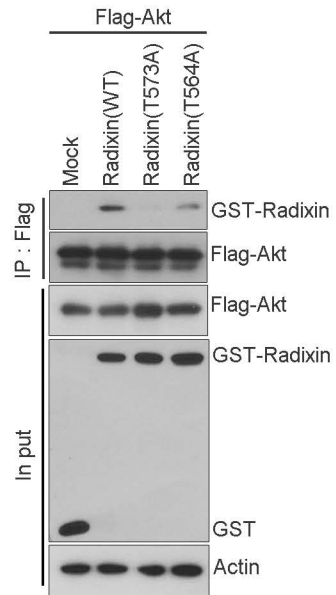

Figure S2

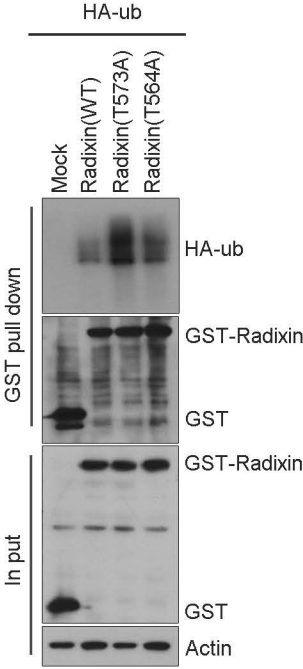

**Figure S3**

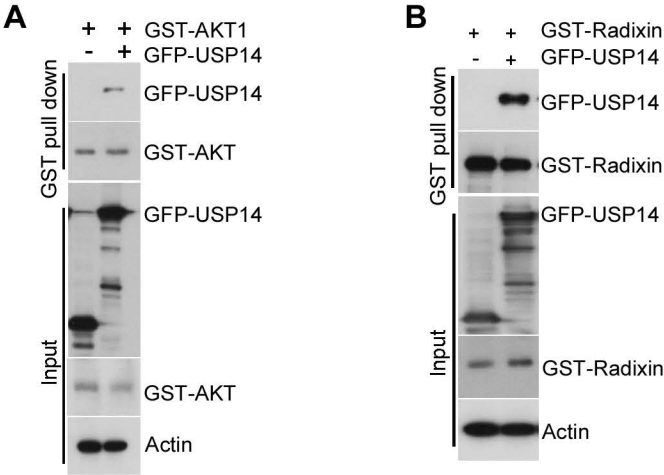

**Figure S4**

**1B**

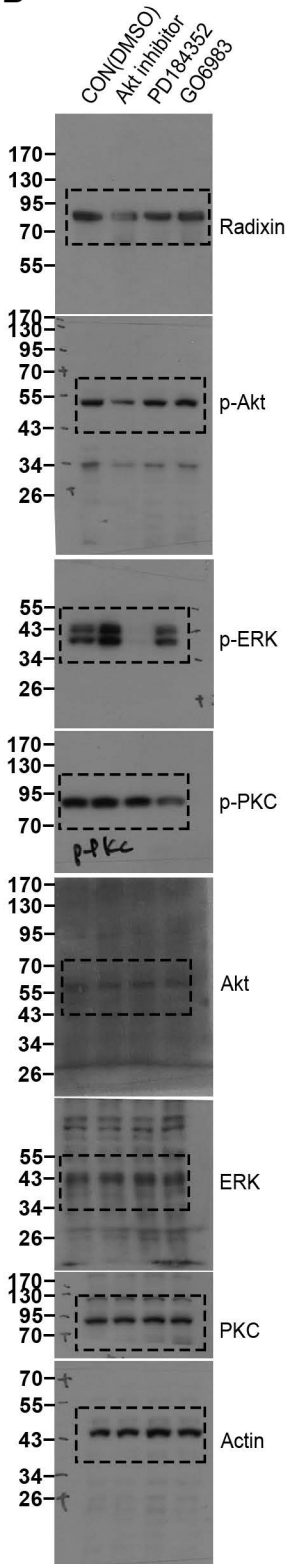

**1C**

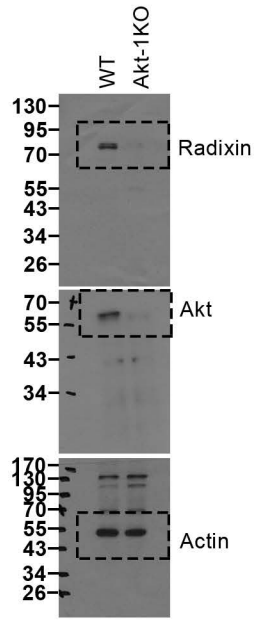

**1D**

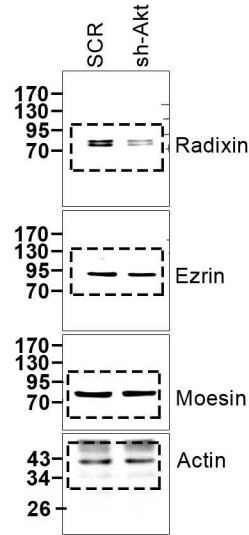

**1E**

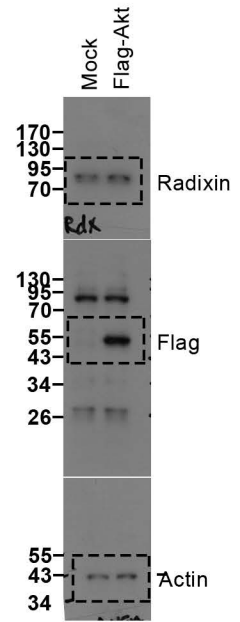

**1F**

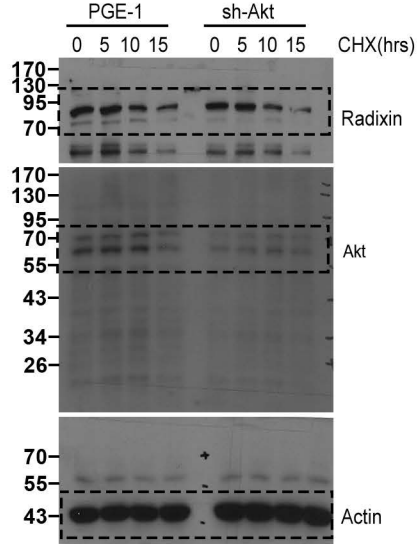

**1G**

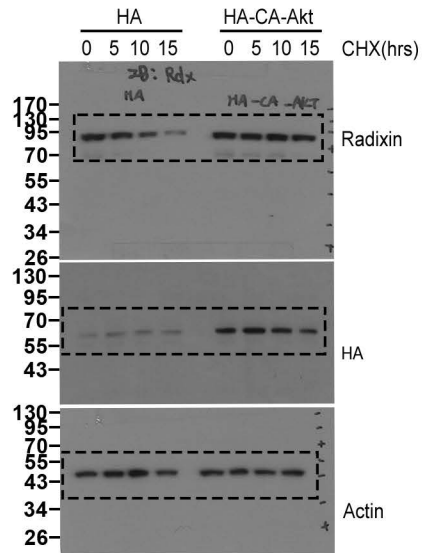

**Figure S5**

**2A**

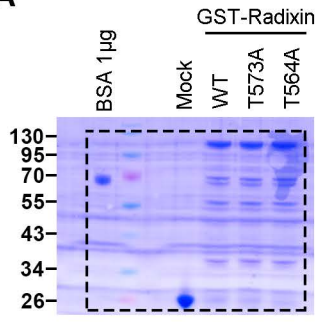

**2B**

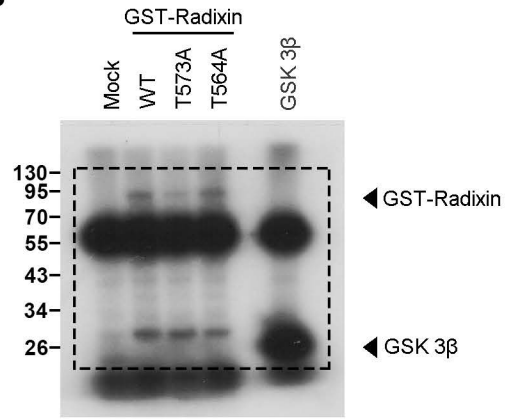



**Figure S6**

**3B**

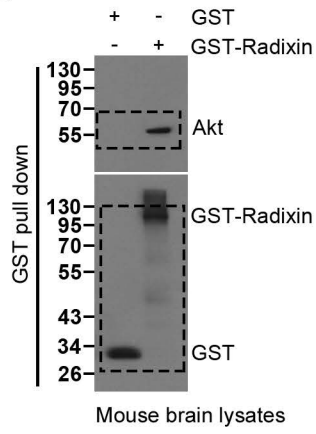

**3C**

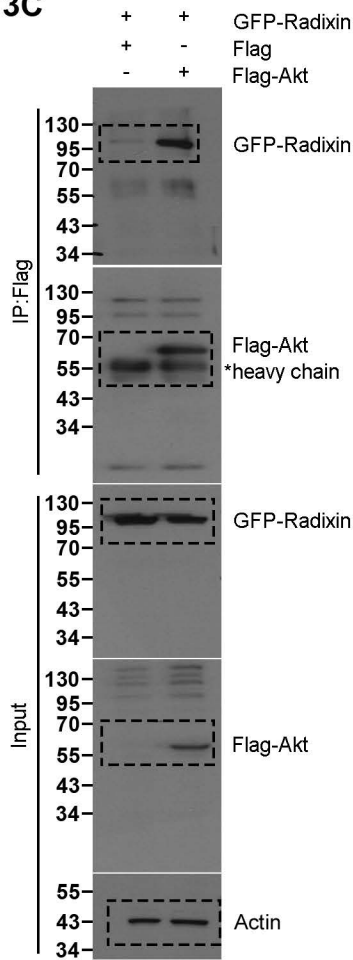

**3D**

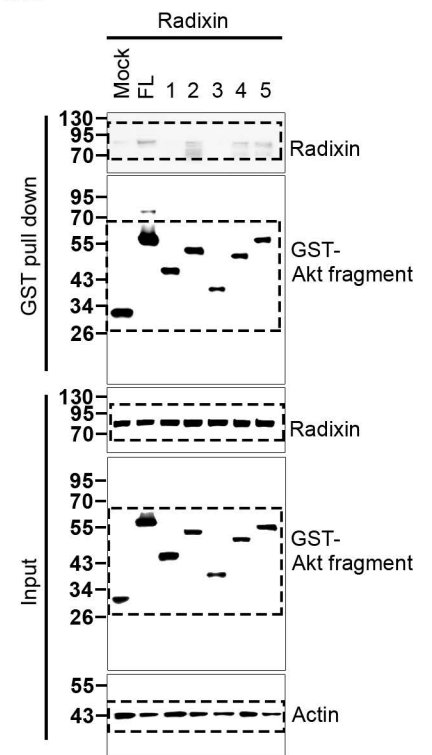

**3E**

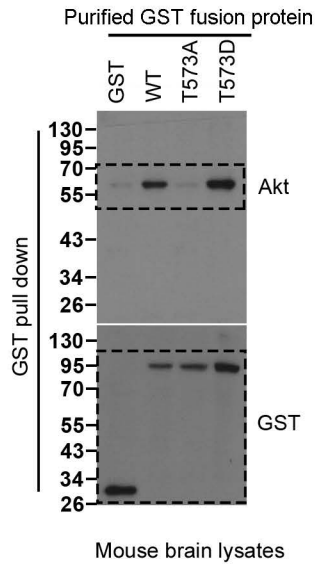

**3F**

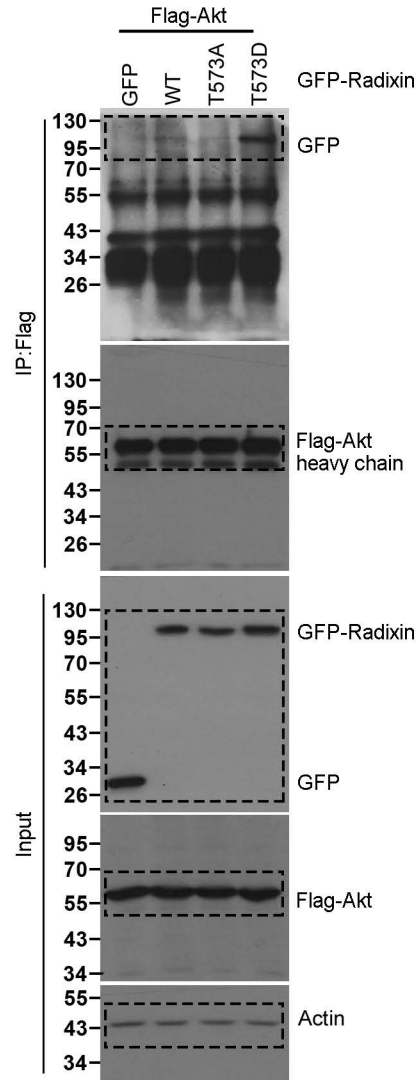

**Figure S7**

**4A**

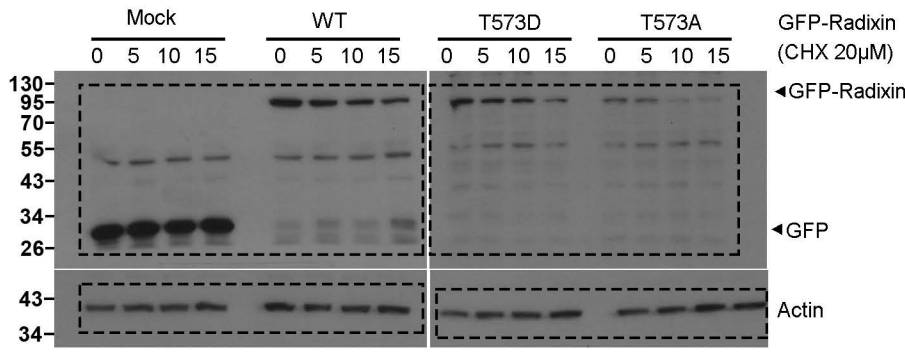

**4B**

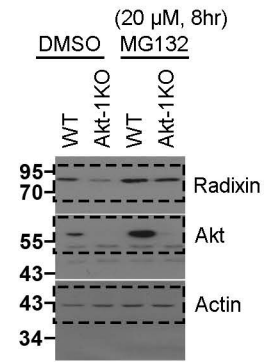

**4C**

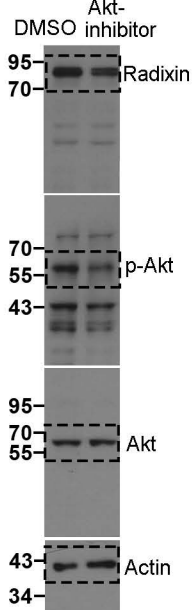

**4D**

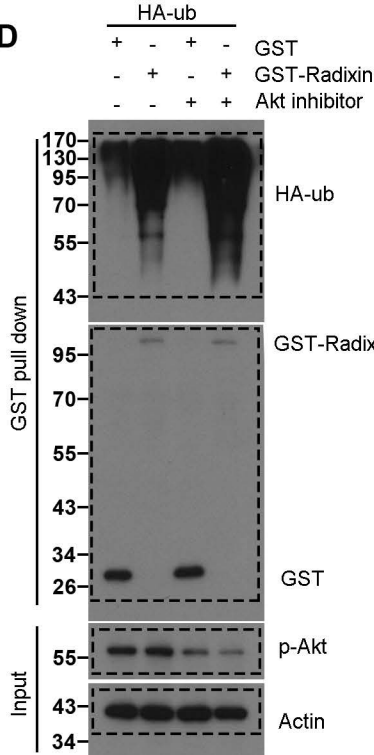

**4E**

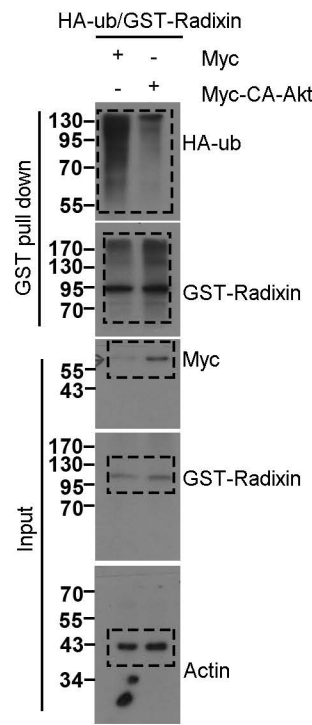

**4F**

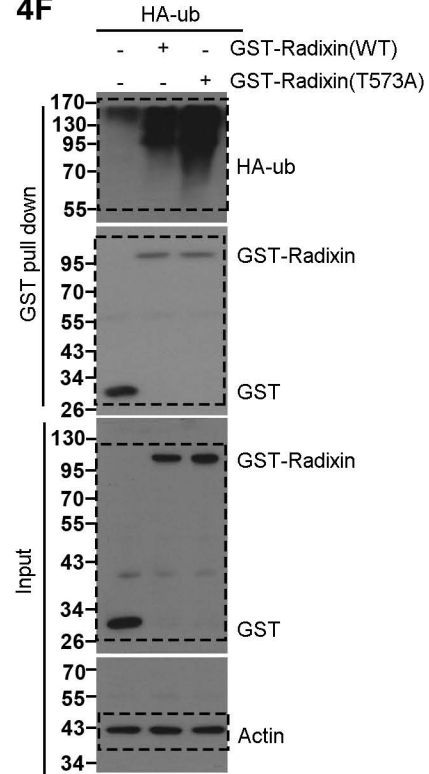

**G**

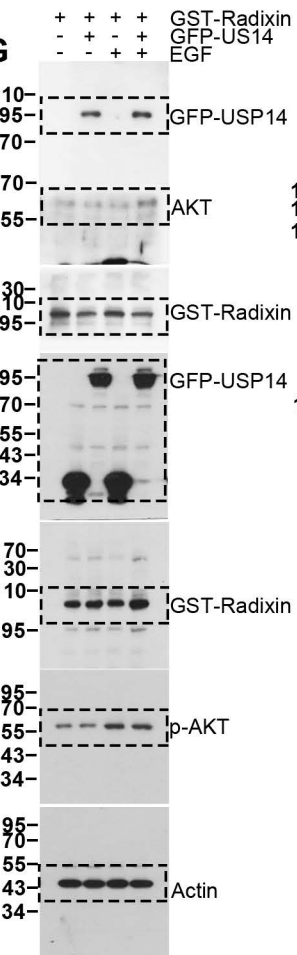

**H**

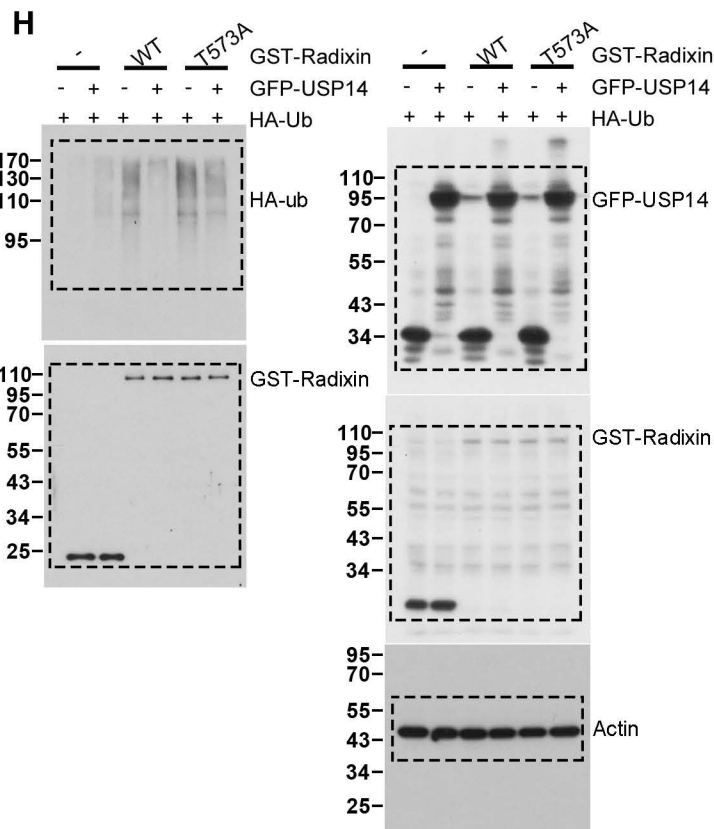

**I**

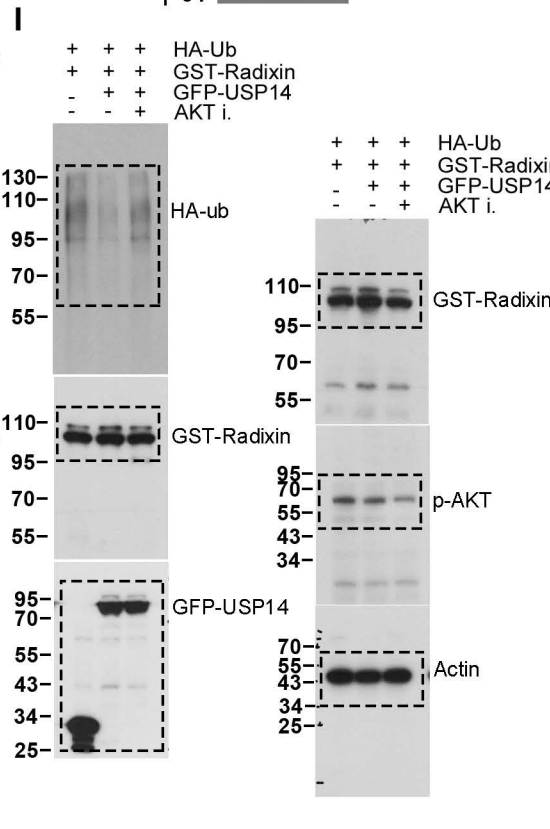

Figure S8

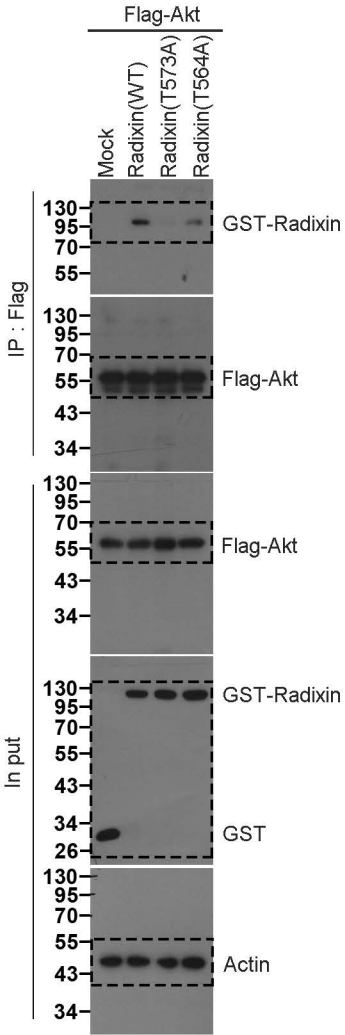

**Figure S9**

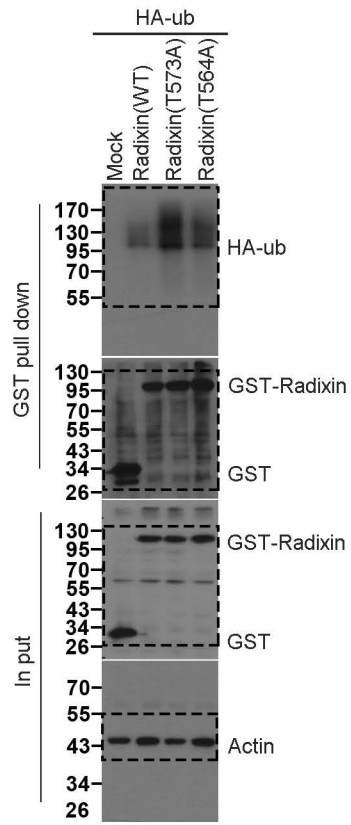

Figure S10

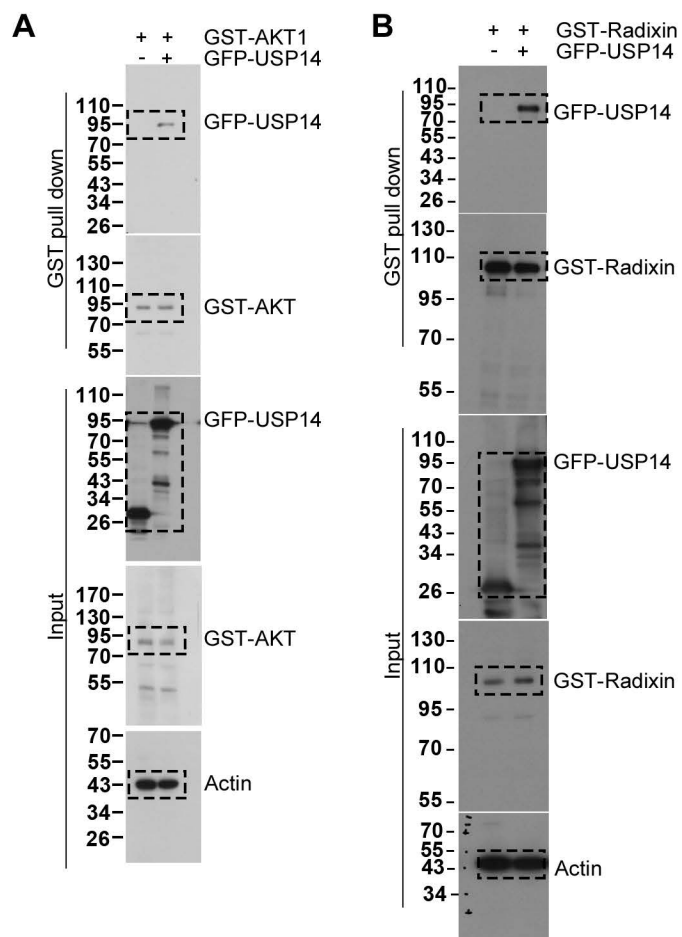

Supplement: 41598_2018_20755_MOESM1_ESM.pdf [file 41598_2018_20755_MOESM1_ESM.pdf]
